# Supplementary material
Source: Research Square preprint supplement (doi:10.21203/rs.3.rs-9556210/v1)
Supplement: Supplementary file 1 [file 9d32659df55c6916bcd19f63.pdf]

## Supplementary information

Title: Biogeoclimatic regions and land-use structure bacterial biodiversity and nitrogen cycling in headwater stream sediments

Authors: Cabello-Alemán, L., Carpena-Istán, V., Fenoy, E., Pérez, J., Hernández-Maqueda, R., Boyero, L., Casas, J.J., López, M.J.

Journal: Microbial Ecology

Corresponding author: [lca846@ual.es](mailto:lca846@ual.es)

**Table S1** Description of sampling sites, including stream name, land-use type, biogeoclimatic region, geographic coordinates, and altitude

| Stream     | Region                  | Land-use           | Coordinates                 | Altitude (m) |
|------------|-------------------------|--------------------|-----------------------------|--------------|
| Vícar      | Mediterranean lowlands  | Agricultural       | 36°50'06"N<br>2°38'18"W     | 301          |
| Las Negras | Mediterranean lowlands  | Natural vegetation | 36°53'30"N<br>2°00'36"W     | 69           |
| Río Verde  | Mediterranean lowlands  | Forestry           | 36°49'58"N<br>3°44'16"W     | 552          |
| Sierro     | Mediterranean lowlands  | Urban              | 37°19'26"N<br>2°23'58"W     | 700          |
| Gallego    | Sierra Nevada mountains | Agricultural       | 37°09'55"N<br>3°04'43"W     | 1243         |
| Alhama     | Sierra Nevada mountains | Natural vegetation | 37°12'05"N<br>3°15'10"W     | 1373         |
| Del Barrio | Sierra Nevada mountains | Forestry           | 37°09'12"N<br>3°08'03"W     | 1376         |
| Benéjar    | Sierra Nevada mountains | Urban              | 37°10'01"N<br>3°04'35"W     | 1236         |
| Kolitzta   | Cantabrian mountains    | Agricultural       | 43°14'10.2"N<br>3°13'06.5"W | 220          |
| Cuchillo   | Cantabrian mountains    | Natural vegetation | 43°12'45.5"N<br>3°16'14.7"W | 305          |

|            |                      |          |                             |     |
|------------|----------------------|----------|-----------------------------|-----|
| La Tejera  | Cantabrian mountains | Forestry | 43°19'30.9"N<br>3°17'14.6"W | 110 |
| Mercadillo | Cantabrian mountains | Urban    | 43°16'28.5"N<br>3°09'12.3"W | 82  |

**Table S2** Results of permutational multivariate analysis of variance (PERMANOVA) based on Bray–Curtis dissimilarities, testing the effects of biogeoclimatic region and land-use type on bacterial community composition

| Factor          | Df | R <sup>2</sup> | F     | p-value |
|-----------------|----|----------------|-------|---------|
| <b>Region</b>   | 2  | 0.221          | 3.471 | <0.001  |
| <b>Land-use</b> | 3  | 0.253          | 2.648 | <0.001  |

**Table S3** Functional genes involved in major nitrogen-cycling pathways, including KEGG ortholog (KO) identifiers, enzymatic functions, and associated metabolic processes

| Gene        | KO code | Function                                                  | Metabolic pathway                                                       |
|-------------|---------|-----------------------------------------------------------|-------------------------------------------------------------------------|
| <i>amoB</i> | K10945  | ammonia monooxygenase subunit B                           | Nitrification                                                           |
| <i>amoC</i> | K10946  | ammonia monooxygenase subunit C                           | Nitrification                                                           |
| <i>napA</i> | K02567  | nitrate reductase (cytochrome)                            | NO <sub>3</sub> <sup>-</sup> respiration                                |
| <i>napB</i> | K02568  | nitrate reductase (cytochrome)                            | NO <sub>3</sub> <sup>-</sup> respiration                                |
| <i>narI</i> | K00374  | nitrate reductase gamma subunit                           | NO <sub>3</sub> <sup>-</sup> respiration                                |
| <i>narG</i> | K00370  | nitrate reductase / nitrite oxidoreductase, alpha subunit | NO <sub>3</sub> <sup>-</sup> respiration                                |
| <i>narH</i> | K00371  | nitrate reductase / nitrite oxidoreductase, beta subunit  | NO <sub>3</sub> <sup>-</sup> respiration                                |
| <i>nirB</i> | K00362  | nitrite reductase (NADH) large subunit                    | NO <sub>3</sub> <sup>-</sup> -NO <sub>2</sub> <sup>-</sup> assimilation |
| <i>nasC</i> | K00372  | assimilatory nitrate reductase catalytic subunit          | NO <sub>3</sub> <sup>-</sup> -NO <sub>2</sub> <sup>-</sup> assimilation |
| <i>nrtC</i> | K15578  | nitrate/nitrite transport system ATP-binding protein      | NO <sub>3</sub> <sup>-</sup> -NO <sub>2</sub> <sup>-</sup> assimilation |
| <i>nirA</i> | K00366  | ferredoxin-nitrite reductase                              | NO <sub>3</sub> <sup>-</sup> -NO <sub>2</sub> <sup>-</sup> assimilation |
| <i>nirD</i> | K00363  | nitrite reductase (NADH) small subunit                    | NO <sub>3</sub> <sup>-</sup> -NO <sub>2</sub> <sup>-</sup> assimilation |
| <i>narB</i> | K00367  | ferredoxin-nitrate reductase                              | NO <sub>3</sub> <sup>-</sup> -NO <sub>2</sub> <sup>-</sup> assimilation |
| <i>nirS</i> | K15864  | nitrite reductase                                         | Denitrification                                                         |
| <i>norB</i> | K04561  | nitric oxide reductase subunit B                          | Denitrification                                                         |

|                |        |                                                 |                                           |
|----------------|--------|-------------------------------------------------|-------------------------------------------|
| <i>norC</i>    | K02305 | nitric oxide reductase subunit C                | Denitrification                           |
| <i>nosZ</i>    | K00376 | nitrous-oxide reductase                         | Denitrification                           |
| <i>nirK</i>    | K00368 | nitrite reductase                               | Denitrification                           |
| <i>nifD</i>    | K02586 | nitrogenase molybdenum-iron protein alpha chain | N fixation                                |
| <i>nifK</i>    | K02591 | nitrogenase molybdenum-iron protein beta chain  | N fixation                                |
| <i>anfG</i>    | K00531 | nitrogenase delta subunit                       | N fixation                                |
| <i>nifH</i>    | K02588 | nitrogenase iron protein                        | N fixation                                |
| <i>gltD</i>    | K00266 | glutamate synthase (NADPH) small chain          | NH <sub>4</sub> <sup>+</sup> assimilation |
| <i>GLUD1_2</i> | K00261 | glutamate dehydrogenase (NAD(P)+)               | NH <sub>4</sub> <sup>+</sup> assimilation |
| <i>glnA</i>    | K01915 | glutamine synthetase                            | NH <sub>4</sub> <sup>+</sup> assimilation |
| <i>nrfH</i>    | K15876 | cytochrome c nitrite reductase small subunit    | DNRA                                      |
| <i>nrfA</i>    | K03385 | nitrite reductase (cytochrome c-552)            | DNRA                                      |
| <i>hcp</i>     | K05601 | hydroxylamine reductase                         | Unassigned                                |
